# Supplementary material for: Spatial inequalities in behavioural and cardiometabolic health risk factors among Australian adults
Source: Research Square preprint supplement (doi:10.21203/rs.3.rs-8497133/v1), 2026-02-12
Supplement: Supplementary file 1 [file 9f9a74bba088810a0f2e2955.docx]

**Supplementary Materials**

**Supplementary Tables**

**Table S1. Prevalence of behavioural health risk factors by remoteness (%)**

| Health Measure | Major Cities (%) | Inner Regional (%) | Outer Regional / Remote (%) |
| --- | --- | --- | --- |
| Current daily smoker | 9.4 | 13.3 | 16.7 |
| Did not meet 2014 physical activity guidelines | 74.9 | 74.1 | 79.8 |
| High blood pressure (≥140 / 90 mmHg) | 22.4 | 26.2 | 25.2 |
| Obese (30.00 or more) | 30.1 | 36.8 | 35.8 |
| Overweight / Obese (25.00 or more) | 64.3 | 69.6 | 70.8 |

Notes: Includes smoking, alcohol consumption, physical activity, and related indicators. Percentages refer to adults aged 18 years and over. Source: Australian Bureau of Statistics, National Health Survey 2022.

**Table S2. Prevalence of cardiometabolic health risk factors by remoteness (%)**

| Health Measure | Major Cities (%) | Outer Regional / Remote (%) | Absolute Gap (pp) | Ratio |
| --- | --- | --- | --- | --- |
| Current daily smoker | 9.4 | 16.7 | 7.3 | 1.78 |
| Did not meet 2014 physical activity guidelines | 74.9 | 79.8 | 4.9 | 1.07 |
| High blood pressure (≥140 / 90 mmHg) | 22.4 | 25.2 | 2.8 | 1.13 |
| Obese (30.00 or more) | 30.1 | 35.8 | 5.7 | 1.19 |
| Overweight / Obese (25.00 or more) | 64.3 | 70.8 | 6.5 | 1.1 |

Notes: Includes obesity, overweight, blood pressure, and related indicators. Percentages refer to adults aged 18 years and over. Source: Australian Bureau of Statistics, National Health Survey 2022.

**Table S3. Absolute differences in behavioural health risk factors between major cities and outer regional/remote areas**

| Health Measure | Lowest Group | Lowest Value (%) | Highest Group | Highest Value (%) |
| --- | --- | --- | --- | --- |
| Current daily smoker | Major Cities | 9.4 | Outer Regional / Remote | 16.7 |
| Did not meet 2014 physical activity guidelines | Inner Regional | 74.1 | Outer Regional / Remote | 79.8 |
| High blood pressure (≥140 / 90 mmHg) | Major Cities | 22.4 | Inner Regional | 26.2 |
| Obese (30.00 or more) | Major Cities | 30.1 | Inner Regional | 36.8 |
| Overweight / Obese (25.00 or more) | Major Cities | 64.3 | Outer Regional / Remote | 70.8 |

Notes: Absolute differences are expressed in percentage points. Source: Australian Bureau of Statistics, National Health Survey 2022.

**Table S4. Relative differences in behavioural health risk factors between major cities and outer regional/remote areas**

| Health Measure | Lowest Group | Lowest Value (%) | Highest Group | Highest Value (%) |
| --- | --- | --- | --- | --- |
| Australian Adult Alcohol Guideline 2020 – Exceeded guideline | Major Cities of Australia | 25.6 | Outer Regional and Remote Australia | 30.9 |
| Consumed 5 or more drinks on any day in the last 12 months at least monthly | Major Cities of Australia | 19.9 | Outer Regional and Remote Australia | 24.6 |
| Consumed more than 10 drinks in the last week | Major Cities of Australia | 17.2 | Inner Regional Australia | 23 |
| Current daily e-cigarette / vaping device use | Outer Regional and Remote Australia | 2.3 | Major Cities of Australia | 3.2 |
| Current daily smoker | Major Cities of Australia | 9.4 | Outer Regional and Remote Australia | 16.7 |
| Daily consumption of fruit — Did not meet recommendation | Inner Regional Australia | 54.7 | Outer Regional and Remote Australia | 58.6 |
| Daily consumption of vegetables — Did not meet recommendation | Inner Regional Australia | 91.2 | Major Cities of Australia | 94.1 |
| Did not meet 2014 physical activity guidelines | Inner Regional Australia | 74.1 | Outer Regional and Remote Australia | 79.8 |
| Did not meet 2014 physical activity guidelines excluding workplace activity | Major Cities of Australia | 75.6 | Outer Regional and Remote Australia | 80.4 |
| High blood pressure (≥140 / 90 mmHg) | Major Cities of Australia | 22.4 | Inner Regional Australia | 26.2 |
| Increased risk | Outer Regional and Remote Australia | 19.9 | Inner Regional Australia | 21.1 |
| Obese (30.00 or more) | Major Cities of Australia | 30.1 | Inner Regional Australia | 36.8 |
| Overweight (25.00 – 29.99) | Inner Regional Australia | 32.7 | Outer Regional and Remote Australia | 34.9 |
| Overweight / Obese (25.00 or more) | Major Cities of Australia | 64.3 | Outer Regional and Remote Australia | 70.8 |
| Substantially increased risk | Major Cities of Australia | 44.9 | Outer Regional and Remote Australia | 53.9 |
| Zero minutes of physical activity | Major Cities of Australia | 10.5 | Outer Regional and Remote Australia | 18.2 |
| Zero minutes of physical activity excluding workplace | Major Cities of Australia | 12.7 | Outer Regional and Remote Australia | 23.1 |

Notes: Relative differences are expressed as prevalence ratios. Source: Australian Bureau of Statistics, National Health Survey 2022.

**Supplementary Figures**

**Figure S1. Prevalence of alcohol-related risk indicators by remoteness of residence**

|  |
| --- |
| Notes: Percentages refer to adults aged 18 years and over. Source: Australian Bureau of Statistics, National Health Survey 2022. |

**Figure S2. Prevalence of extreme physical inactivity by remoteness of residence**

Notes: Extreme inactivity defined as zero minutes of physical activity. Percentages refer to adults aged 18 years and over. Source: Australian Bureau of Statistics, National Health Survey 2022.
